# Supplementary material for: Identification of models, theoretical design and formal evaluation of integrated specialist community health service provision for the first 2000 days: a protocol for a scoping review
Source: HighWire-hosted journal article supplement (doi:10.1136/bmjopen-2021-054807), 2022-03-01
Supplement: bmjopen-2021-054807supp001_data_supplement.pdf [file bmjopen-2021-054807supp001_data_supplement.pdf]

## Additional File 1 Logbook / Search Strategy for Pilot Searches for Existing Reviews

*Protocol for a scoping review to identify models, theoretical design, and formal evaluation of integrated specialist community health service provision for the first 2000 days*

### DESCRIPTION OF PRELIMINARY SEARCH TO IDENTIFY NEED FOR SCOPING REVIEW

**Background searching** began Dec 2020 to identify Mesh Terms (Cochrane):

Mesh Terms identified in initial search:

- “Specialization”
- “Delivery of Health Care, Integrated”
- “Community Health Services”
- “Child Health Services” “Maternal-Child Health Services”
- “Child, Preschool” and “Infant”

Title and abstract (tiab) terms were identified in January 2021 (see Table 1).

Table 1. Tiab terms identified (PubMed)

| Grouping           | Free text terms PubMed                                                                                                          | Results |
|--------------------|---------------------------------------------------------------------------------------------------------------------------------|---------|
| #1<br>(Population) | “Early childhood”[tiab] OR “Early child*”[tiab] OR<br>“Maternal and child”[tiab]                                                |         |
| #2 (Concept)       | “Integrated”[tiab] AND “Specialist health care”[tiab] OR<br>“Specialist healthcare”[tiab] OR “Specialist health-<br>care”[tiab] |         |
| #3 (Context)       | “Community health”[tiab] OR “Community health<br>service”[tiab]                                                                 |         |
| #4                 | #1 AND #2 AND #3                                                                                                                |         |

Reflective notes following initial searches: No date restrictions were applied to most searches with the exception of OVID Medline (1991-current). Thoughts after a quick review of articles – how to approach? It might need to be about the model (see Wolfe et al. 2020).

#### 27<sup>th</sup> Jan 2021 Definitions of integrated care:

Goodwin (2016, p.1) [1] includes two broad principles to 1) bring care delivery systems together, and 2) deliver optimal care that is centred around people’s needs.

Wolfe et al. (2017) [2] present models based on an ecological systems perspective, and *cooperation between professionals to deliver person-centred care*. Cooperation between sectors can include between vertical care (primary care and secondary health care), horizontal care (health care and education), intersectorial care (health, education and social services), or longitudinal (health and non-health over time).

Hughes et al. (2020) [3] - an emerging set of clinical and policy practices shaped by context – 2 parts, the *methods* to organise, fund and deliver care, and the *goals* of outcomes and consumer experience.

N.B. – see Naik and Catic (2021, p.1) [4] “The concept of patient-centred care evolved into a model attuned to the patient experience of care, defined by the interactions between patients and providers and the care environment.”

## FULL SEARCH 23<sup>RD</sup> APRIL 2021, REPEATED 14<sup>TH</sup> OCTOBER 2021

Results are presented for search dated 14<sup>th</sup> October 2021 unless otherwise stated.

**PubMed:** (((("Delivery of Health Care, Integrated"[Mesh]) AND "Child Health Services"[Mesh]) AND "Child, Preschool"[Mesh]) AND "Infant"[Mesh])

Retrieved 149 results, 5 articles were considered following review of title and no scoping review, systematic review or meta-analysis aligned with the objectives of our study.

14<sup>th</sup> October 2021: 149 results (1995-2021).

**Pubmed:** (((("Early childhood"[tiab] OR "Early child\*" [tiab] OR "Maternal and child"[tiab]) AND ("Integrated"[tiab] AND "Specialist health care"[tiab] OR "Specialist healthcare"[tiab] OR "Specialist health-care"[tiab])) AND ("Community health"[tiab] OR "Community health service"[tiab])) AND (#1 AND #2 AND #3)

14<sup>th</sup> October 2021: Retrieved no results

**Cohrane:** "Systematic review" OR "Scoping Review" AND "Child health service\*" AND "Delivery of Health care, Integrated" (Title Abstract Keyword, publication date from Jan 1991 to Oct 2021, word variations were searched)

14<sup>th</sup> October 2021: 1843 Cochrane reviews, 133 Cochrane protocols.

Topic "Child Health" = 16 Protocols (none relevant),

= 541 Reviews

- Topic "Child Health – Public Health" = 19 reviews – none relevant
- Topic Child health – Developmental, psychosocial and learning problems = 34 reviews - none relevant
- Topic Child health – effective practice/health systems = 11 reviews - none relevant

MeSH Search – "Delivery of health care, integrated" and "Child health" and "Effective practice/health systems" = 9 reviews and 5 protocols.

Reviewed abstract of one Protocol - Care co-ordination interventions to improve outcomes during pregnancy and early childhood (up to 5 years), 2017, DOI: 0.1002/14651858.CD012761. This relates to care co-ordination between separately funded services. This is a different perspective to our proposed scoping review.

**CINAHL:** "Health Care Delivery, Integrated" AND "Child Health Services" (MH Exact Subject Heading) 1991-2020, Academic journals, "all infant" and "child, preschool: 2-5"

14<sup>th</sup> Oct 2021: 79 results but no systematic or scoping review.

**Ovid MEDLINE:** (("Systematic review" or "Scoping Review") and "Child Health Service\*" and "Delivery of Health care, Integrated").sh. (Mesh subject heading) limit 1 to english language and humans and year="1991-current" and "all child (0 to 18 years)"

14<sup>th</sup> Oct 2021: 14 results. Reviewed abstract of three articles:

1. Wolfe I, Satherley RM, Scotney E, Newham J, Lingam R. Integrated Care Models and Child Health: A Meta-analysis. *Pediatrics*. 145(1), 2020 01. This does not focus on early childhood and is specific to primary care and Integrated management of childhood illness.
2. Burkhart K, Asogwa K, Muzaffar N, Gabriel M. Pediatric Integrated Care Models: A Systematic Review. *Clinical Pediatrics*. 59(2):148-153, 2020 02. This is about psychiatric care.
3. Pandey A, Gireesh A, Viner R. Feasibility, acceptability, and effectiveness of young people-specific, integrated out-of-hospital services: a protocol for a systematic review. *Systematic Reviews*. 8(1):77, 2019 03 28. 10-24 years of age.

**Epistemonikos:** (title:(Systematic review OR Scoping Review) OR abstract:(Systematic review OR Scoping Review)) AND (title:(Child Health Services) OR abstract:(Child Health Services)) AND (title:(Integrated) OR abstract:(Integrated))

14<sup>th</sup> Oct 2021: 22 results, none relevant

**EPPI Centre:** 24 April 2021: Integrated care and education, one result was not relevant (2004).

<https://eppi.ioe.ac.uk/cms/Default.aspx?tabid=152>

#### REFERENCE LIST

1. Goodwin N. Understanding integrated care. *International Journal of Integrated Care*. 2016;16:6.
2. Wolfe I, Mandeville K, Harrison K, Lingam R. Child survival in England: Strengthening governance for health. *Health Policy*. 2017;121:1131–8.
3. Hughes G, Shaw SE, Greenhalgh T. Rethinking Integrated Care: A Systematic Hermeneutic Review of the Literature on Integrated Care Strategies and Concepts. *The Milbank Quarterly*. 2020;98:446–92.
4. Naik AD, Catic A. Achieving patient priorities: an alternative to patient-reported outcome measures (PROMs) for promoting patient-centred care. *BMJ Qual Saf*. 2021;30:92–5.
